# Supplementary material
Source: PubMed Central journal article supplement (PMC5963742)
Supplement: bgx003_suppl_Supplemental_Table_1.pdf [file bgx003_suppl_Supplemental_Table_1.pdf]

| Compound                        | CAS No.     | ER            |             |                      | EGFR                 |                    |               | NFkB/oxidative stress |                            |                                  | Lowest AC50 | Average AC50 (for values <10 µM) |            |
|---------------------------------|-------------|---------------|-------------|----------------------|----------------------|--------------------|---------------|-----------------------|----------------------------|----------------------------------|-------------|----------------------------------|------------|
|                                 |             | ATG_ERa_TRANS | ATG_ERE_CIS | NCGC_ERalpha_Agonist | BSK_hDFCGF_EGFR_down | BSK_hDFCGF_EGFR_up | NVS_ENZ_hAKT1 | ATG_NF_kB_CIS         | Cellumen Phospho-H2AX_24hr | HUVEC_PBMC_LPS_24_TNF_alpha_down |             |                                  |            |
| HPTE                            | 2971-36-0   | 0.73          | 0.17        | 0.194                |                      |                    |               |                       |                            |                                  | 0.17        | 0.36466667                       |            |
| Metiram-zinc                    | 9006-42-2   |               |             |                      |                      |                    | 0.65          |                       |                            |                                  | 0.65        | 0.65                             |            |
| Tebufenpyrad                    | 119168-77-3 |               |             |                      |                      | 13.3               |               |                       | 0.83                       | 195                              | 0.83        | 0.83                             |            |
| Bisphenol A                     | 80-05-7     | 1.1           | 0.64        | 1.72                 |                      |                    |               |                       |                            |                                  | 0.64        | 1.15333333                       |            |
| Niclosamide                     | 50-65-7     |               |             |                      |                      |                    | 1.48          |                       | 1                          | 1.61                             | 1           | 1.36333333                       |            |
| Maneb                           | 12427-38-2  |               |             |                      |                      |                    | 1.48          | 1.4                   |                            | 46.1                             | 40          | 1.4                              | 1.44       |
| Atrazine                        | 1912-24-9   |               |             |                      |                      |                    | 13.3          |                       |                            |                                  | 1.48        | 1.48                             | 1.48       |
| Azamethiphos                    | 35575-96-3  |               |             |                      |                      |                    | 1.48          |                       |                            |                                  |             | 1.48                             | 1.48       |
| Bentazone                       | 25057-89-0  |               |             |                      |                      |                    | 1.48          |                       |                            |                                  |             | 1.48                             | 1.48       |
| Captan                          | 133-06-2    |               |             |                      |                      |                    | 1.48          |                       |                            | 114                              | 40          | 1.48                             | 1.48       |
| Carbaryl                        | 63-25-2     |               | 57          |                      |                      |                    | 1.48          |                       |                            | 200                              |             | 1.48                             | 1.48       |
| Chloridazon                     | 1698-60-8   |               |             |                      |                      |                    | 1.48          |                       |                            |                                  |             | 1.48                             | 1.48       |
| Clothianidin                    | 210880-92-5 |               |             |                      |                      |                    | 1.48          |                       |                            |                                  |             | 1.48                             | 1.48       |
| Cyanazine                       | 21725-46-2  |               |             |                      |                      |                    |               |                       |                            |                                  | 1.48        | 1.48                             | 1.48       |
| Dichloran                       | 99-30-9     |               |             |                      |                      |                    | 1.48          |                       |                            |                                  |             | 1.48                             | 1.48       |
| Diclofop-methyl                 | 51338-27-3  |               |             |                      |                      | 1.48               |               |                       | 54                         |                                  |             | 1.48                             | 1.48       |
| Ethametsulfuron methyl          | 97780-06-8  |               |             |                      |                      | 1.48               |               |                       |                            |                                  |             | 1.48                             | 1.48       |
| Fluazifop-P-butyl               | 79241-46-6  |               | 50          |                      |                      |                    | 1.48          |                       |                            |                                  |             | 1.48                             | 1.48       |
| Forchlorfenuron                 | 68157-60-8  |               |             |                      |                      |                    | 1.48          |                       |                            | 48                               | 40          | 1.48                             | 1.48       |
| Imazaquin                       | 81335-37-7  |               |             |                      |                      |                    | 1.48          |                       |                            |                                  |             | 1.48                             | 1.48       |
| Isoxaflutole                    | 141112-29-0 |               |             |                      |                      |                    | 1.48          |                       |                            |                                  |             | 1.48                             | 1.48       |
| MBP (Monobutyl phthalate)       | 131-70-4    |               |             |                      |                      |                    | 1.48          |                       |                            |                                  |             | 1.48                             | 1.48       |
| Meviphos                        | 7786-34-7   |               |             |                      |                      |                    | 1.48          |                       |                            |                                  |             | 1.48                             | 1.48       |
| Norflurazon                     | 27314-13-2  |               |             |                      |                      | 1.48               |               |                       |                            |                                  |             | 1.48                             | 1.48       |
| Oryzalin                        | 19044-88-3  |               |             |                      |                      |                    | 1.48          |                       |                            |                                  |             | 1.48                             | 1.48       |
| Prohexadione-calcium            | 127277-53-6 |               |             |                      |                      |                    | 1.48          |                       |                            |                                  |             | 1.48                             | 1.48       |
| Pyrimethanil                    | 53112-28-0  |               |             |                      |                      |                    | 1.48          |                       |                            |                                  |             | 1.48                             | 1.48       |
| Quintozene                      | 82-68-8     |               | 14          |                      |                      |                    | 1.48          |                       |                            |                                  | 40          | 1.48                             | 1.48       |
| Rotenone                        | 83-79-4     |               |             |                      |                      |                    | 1.48          |                       |                            | 25.3                             |             | 1.48                             | 1.48       |
| Simazine                        | 122-34-9    |               |             |                      |                      |                    | 1.48          |                       |                            |                                  |             | 1.48                             | 1.48       |
| Mancozeb                        | 8018-01-7   |               |             |                      |                      |                    |               | 1.6                   |                            |                                  |             | 1.6                              | 1.6        |
| Chlorothalonil                  | 1897-45-6   |               |             |                      |                      |                    |               |                       |                            | 2.26                             | 1.48        | 1.48                             | 1.87       |
| Bensulide                       | 741-58-2    | 2             |             |                      |                      |                    |               |                       |                            | 105                              |             | 2                                | 2          |
| Endosulfan                      | 115-29-7    | 2.1           |             |                      |                      |                    |               |                       |                            |                                  |             | 2.1                              | 2.1        |
| Dicofol                         | 115-32-2    | 2.7           |             |                      |                      |                    |               |                       |                            |                                  |             | 2.7                              | 2.7        |
| Methoxychlor                    | 72-43-5     | 2.7           | 4           | 3.93                 |                      | 1.48               |               |                       |                            | 85.2                             |             | 1.48                             | 3.0275     |
| Flumetralin                     | 62924-70-3  | 5.4           | 2.4         | 4.52                 |                      |                    |               |                       |                            |                                  |             | 2.4                              | 4.10666667 |
| Fluazinam                       | 79622-59-6  |               |             |                      |                      |                    |               |                       |                            | 4.27                             |             | 4.27                             | 4.27       |
| Boric acid                      | 10043-35-3  |               |             |                      |                      | 4.44               |               |                       |                            |                                  |             | 4.44                             | 4.44       |
| Captafol                        | 2425-06-1   |               |             |                      |                      |                    |               |                       |                            | 14.7                             | 4.44        | 4.44                             | 4.44       |
| Ethephon                        | 16672-87-0  |               |             |                      |                      |                    | 4.44          |                       |                            |                                  |             | 4.44                             | 4.44       |
| Etozazole                       | 153233-91-1 |               |             |                      |                      | 4.44               |               |                       |                            |                                  |             | 4.44                             | 4.44       |
| Fenpyroximate (Z,E)             | 111812-58-9 |               |             |                      |                      | 4.44               |               |                       |                            | 66.2                             | 40          | 4.44                             | 4.44       |
| Flumioxazin                     | 103361-09-7 |               |             |                      |                      |                    | 4.44          |                       |                            |                                  |             | 4.44                             | 4.44       |
| Indoxacarb                      | 173584-44-6 |               |             |                      |                      | 4.44               |               |                       |                            |                                  |             | 4.44                             | 4.44       |
| Trifloxystrobin                 | 141517-21-7 |               |             |                      |                      | 4.44               |               |                       |                            | 40                               |             | 4.44                             | 4.44       |
| Zoxamide                        | 156052-68-5 |               |             |                      |                      | 4.44               |               |                       |                            | 13.1                             |             | 4.44                             | 4.44       |
| Profenofos                      | 41198-08-7  | 4.8           |             |                      |                      |                    |               |                       |                            |                                  | 40          | 4.8                              | 4.8        |
| 3-Iodo-2-propynylbutylcarbamate | 55406-53-6  |               |             |                      |                      |                    |               |                       |                            | 5.17                             | 13.3        | 5.17                             | 5.17       |
| Dithiopyr                       | 97886-45-8  |               | 5.2         |                      |                      |                    |               |                       |                            |                                  |             | 5.2                              | 5.2        |
| Fenarimol                       | 60168-88-9  | 8.2           | 5.4         | 7.36                 |                      |                    |               |                       |                            |                                  |             | 5.4                              | 6.98666667 |
| Fenbuconazole                   | 114369-43-6 | 7.4           |             |                      |                      |                    |               |                       |                            |                                  |             | 7.4                              | 7.4        |
| Oxyfluorfen                     | 42874-03-3  | 7.9           |             |                      |                      | 13.3               |               |                       |                            |                                  |             | 7.9                              | 7.9        |
| Fenhexamid                      | 126833-17-8 | 10            | 9.2         |                      |                      |                    |               |                       |                            |                                  |             | 9.2                              | 9.2        |
| Esfenvalerate                   | 66230-04-4  | 9.4           |             |                      |                      |                    |               |                       |                            |                                  |             | 9.4                              | 9.4        |
| Thiram                          | 137-26-8    |               |             |                      |                      |                    |               |                       |                            | 9.51                             | 13.3        | 9.51                             | 9.51       |
| Fludioxonil                     | 131341-86-1 |               | 18          | 9.69                 |                      |                    |               |                       |                            | 18.8                             |             | 9.69                             | 9.69       |
